# Supplementary material
Source: MDPI journal article supplement (https://www.mdpi.com/2673-6004/4/2/15)
Supplement: s1 [file s1]

**Supplementary Table S1.** A list of all converged models ranked according to their AIC. The model formula is a double right-hand formula describing detection covariates followed by density covariates. ~1 ~1 would be a null model.  $\Delta$ AIC is the difference in AIC compared to the lowest AIC (the best model).

| #  | Model formula                                                                                                                            | Key function | $\Delta$ AIC |
|----|------------------------------------------------------------------------------------------------------------------------------------------|--------------|--------------|
| 1  | ~ Covey size + Vegetation cover + Observer<br>~ Wadi Width + I(Wadi Width ^2) + Disturbance * Distance to hillside + Tree cover          | half-normal  | 0.00         |
| 2  | ~ Covey size + Vegetation cover + Observer<br>~ Wadi Width + I(Wadi Width ^2) + Disturbance * Distance to hillside + Tree cover + Season | half-normal  | 1.80         |
| 3  | ~1<br>~ Distance to hillside + Disturbance                                                                                               | hazard rate  | 4.18         |
| 4  | ~1<br>~ Distance to hillside + Disturbance + Season                                                                                      | hazard rate  | 5.93         |
| 5  | ~ Covey size + Observer<br>~ Vegetation cover + Tree cover + Disturbance + Distance to hillside                                          | half-normal  | 6.04         |
| 6  | ~ Covey size + Observer<br>~ Vegetation cover + Tree cover + Disturbance                                                                 | hazard rate  | 6.33         |
| 7  | ~ Covey size + Tree cover + Observer<br>~ Disturbance + Wadi Width + Tree cover + Distance to hillside                                   | hazard rate  | 7.42         |
| 8  | ~ Covey size + Observer<br>~ Vegetation cover + Distance to hillside + Tree cover + Disturbance                                          | hazard rate  | 7.67         |
| 9  | ~ Covey size + Observer<br>~ Vegetation cover + Tree cover + Disturbance + Distance to hillside + Season                                 | half-normal  | 8.01         |
| 10 | ~ Observer + Tree cover<br>~ Disturbance + Distance to hillside                                                                          | hazard rate  | 8.27         |
| 11 | ~1 ~1                                                                                                                                    | hazard rate  | 38.12        |
| 12 | ~1 ~1                                                                                                                                    | half-normal  | 39.28        |

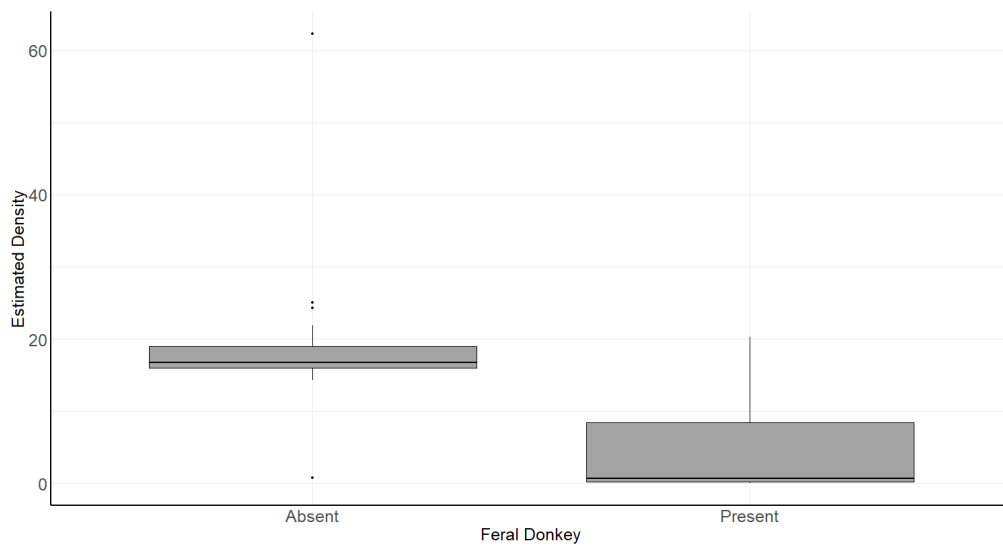

**Supplementary Figure S1.** Boxplot showing the estimated density of the Arabian Partridge in sites where feral donkeys were not recorded (absent) and in sites where feral recorded (present) in Harrat Uwayrid Biosphere Reserve, Saudi Arabia. Black lines in boxes represent median values of the estimated density, while the lower and upper box edges represent the 25th and 75th percentile of the density, respectively.
